# Supplementary material for: Selective Binding of Heparin/Heparan Sulfate Oligosaccharides to Factor H and Factor H-Related Proteins: Therapeutic Potential for C3 Glomerulopathies
Source: PubMed Central journal article supplement (PMC8416517; doi:10.3389/fimmu.2021.676662), 2021-08-18
Supplement: Image_3.pdf [file Image_3.pdf]

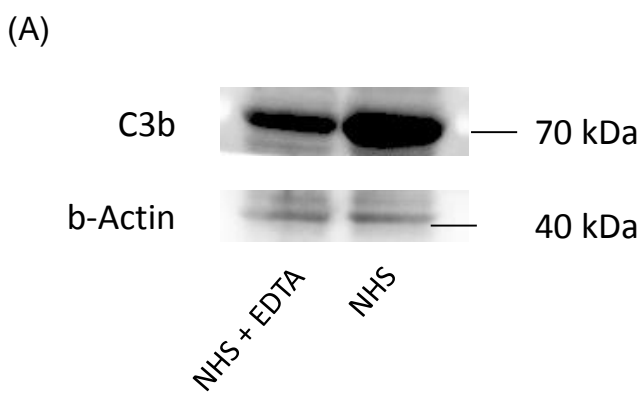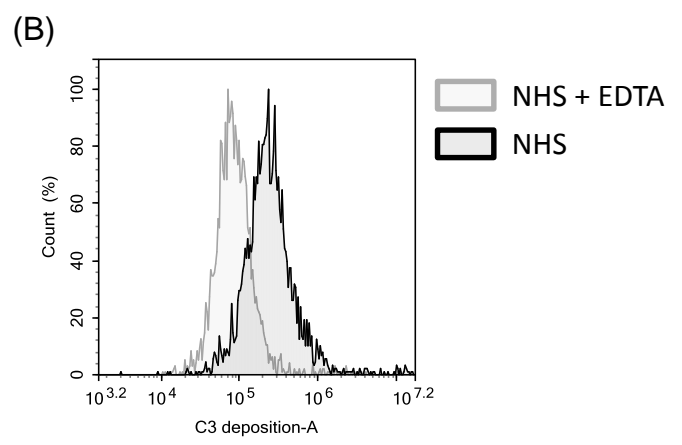

(C)

| Sample     | Area - WB | MFI - FCM |
|------------|-----------|-----------|
| NHS + EDTA | 9734.681  | 37.346    |
| NHS        | 16601.045 | 83.064    |
| Ratio      | 1.7       | 2.2       |
