# Supplementary material for: Selective Binding of Heparin/Heparan Sulfate Oligosaccharides to Factor H and Factor H-Related Proteins: Therapeutic Potential for C3 Glomerulopathies
Source: PubMed Central journal article supplement (PMC8416517; doi:10.3389/fimmu.2021.676662), 2021-08-18

(A)

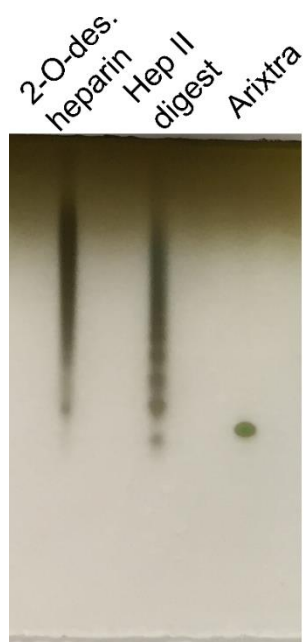

(C)

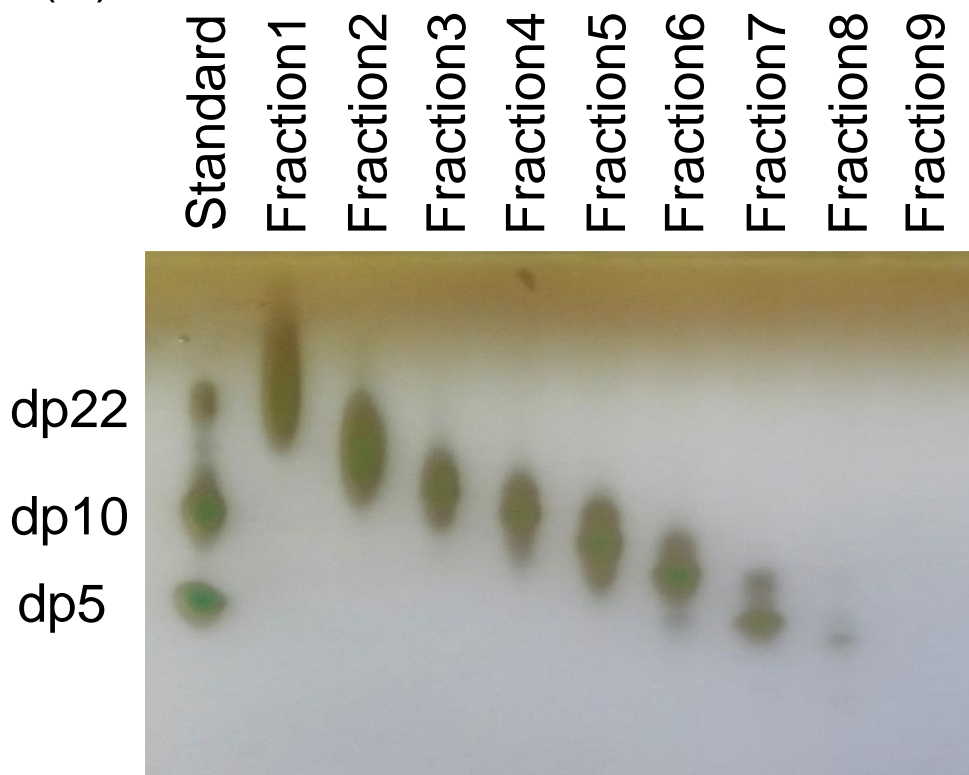

(B)

Fraction1  
Fraction2  
Fraction3  
Fraction4  
Fraction5  
Fraction6  
Fraction7  
Fraction8  
Fraction9

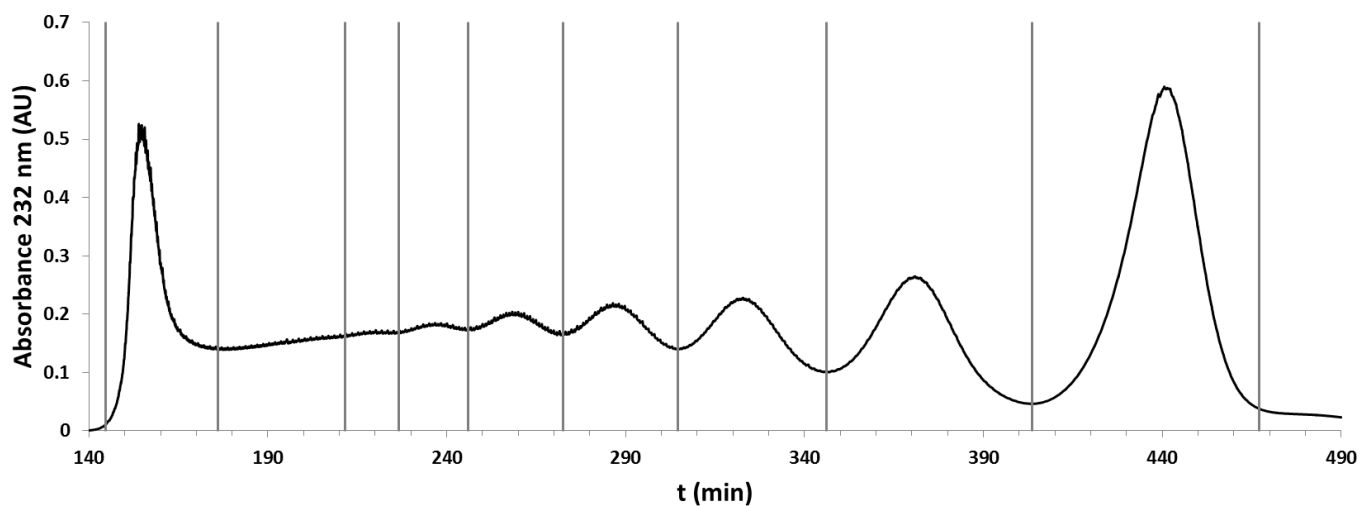

Supplement: Image_6.pdf [file Image_6.pdf]
